# Supplementary material
Source: Research Square preprint supplement (doi:10.21203/rs.3.rs-9483308/v1)
Supplement: Supplementary file 2 [file b3b5e221da32a296dad835f6.pdf]

## Supporting Information S4

Bias and standard error plots for  $n = \{500, 5000\}$ , for incorrectly centred priors.

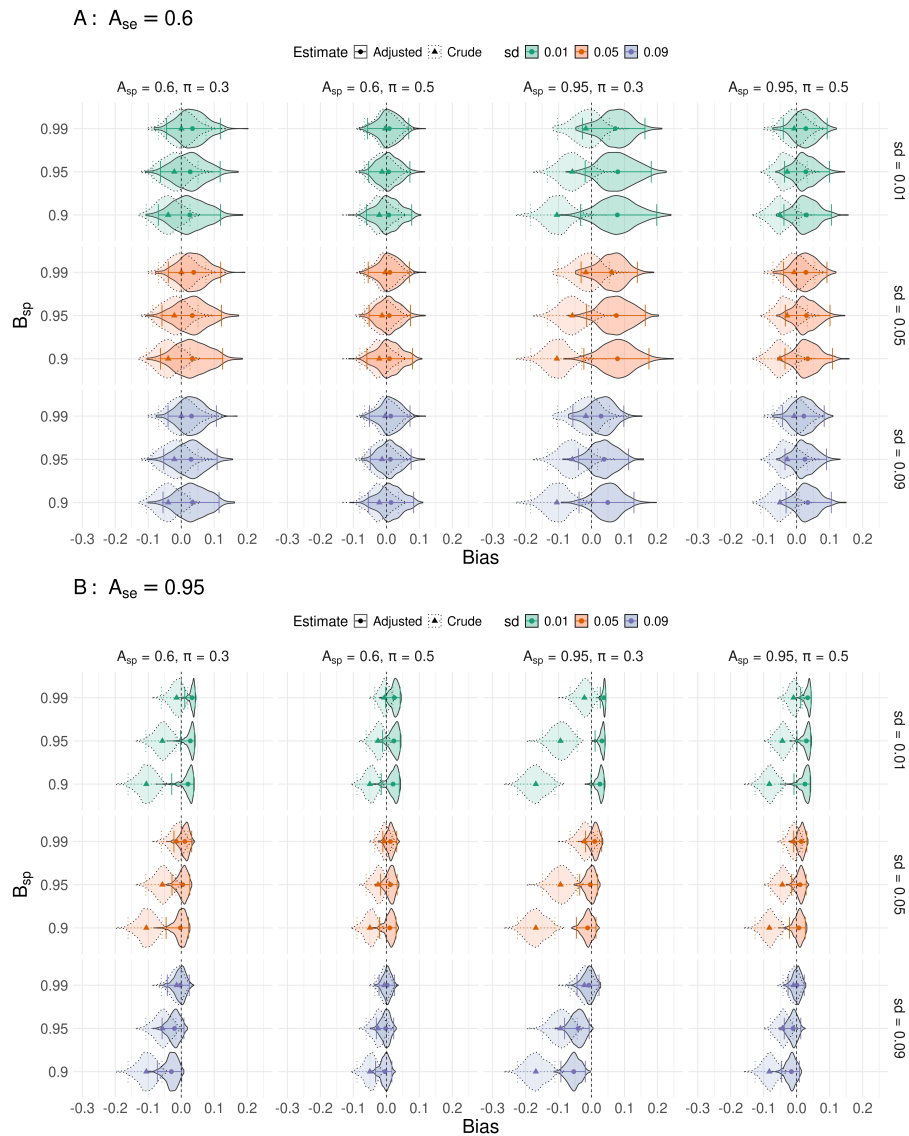

S4.1: Bias in the adjusted and crude estimates of  $A_{se}$ , for low (A) and high (B) values of  $A_{se}$ , when  $n_{obs} = 500$ , for correctly centred priors. Points represent the mean bias across simulations, and vertical lines show the 2.5th and 97.5th percentiles.

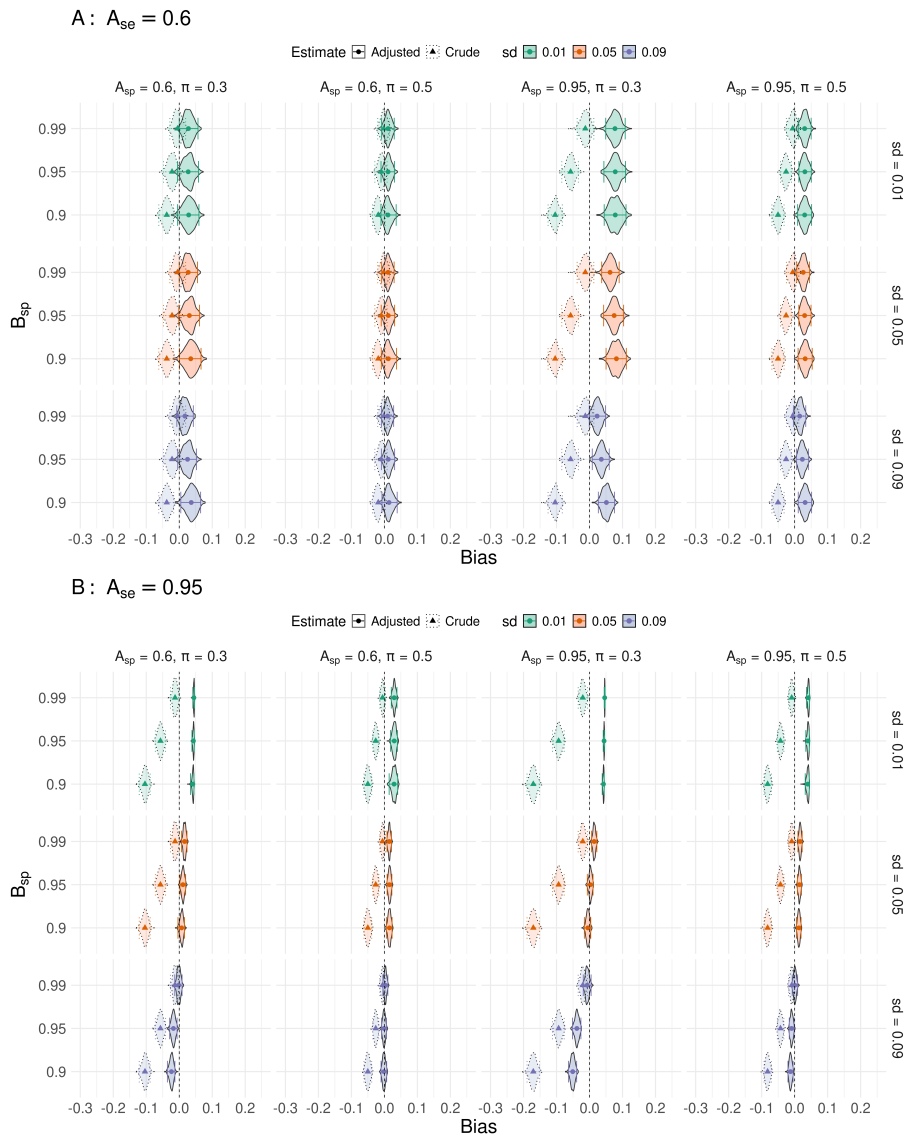

S4.2: Bias in the adjusted and crude estimates of  $A_{se}$ , for low (A) and high (B) values of  $A_{se}$ , when  $n_{obs} = 5000$ , for incorrectly centred priors. Points represent the mean bias across simulations, and vertical lines show the 2.5th and 97.5th percentiles.

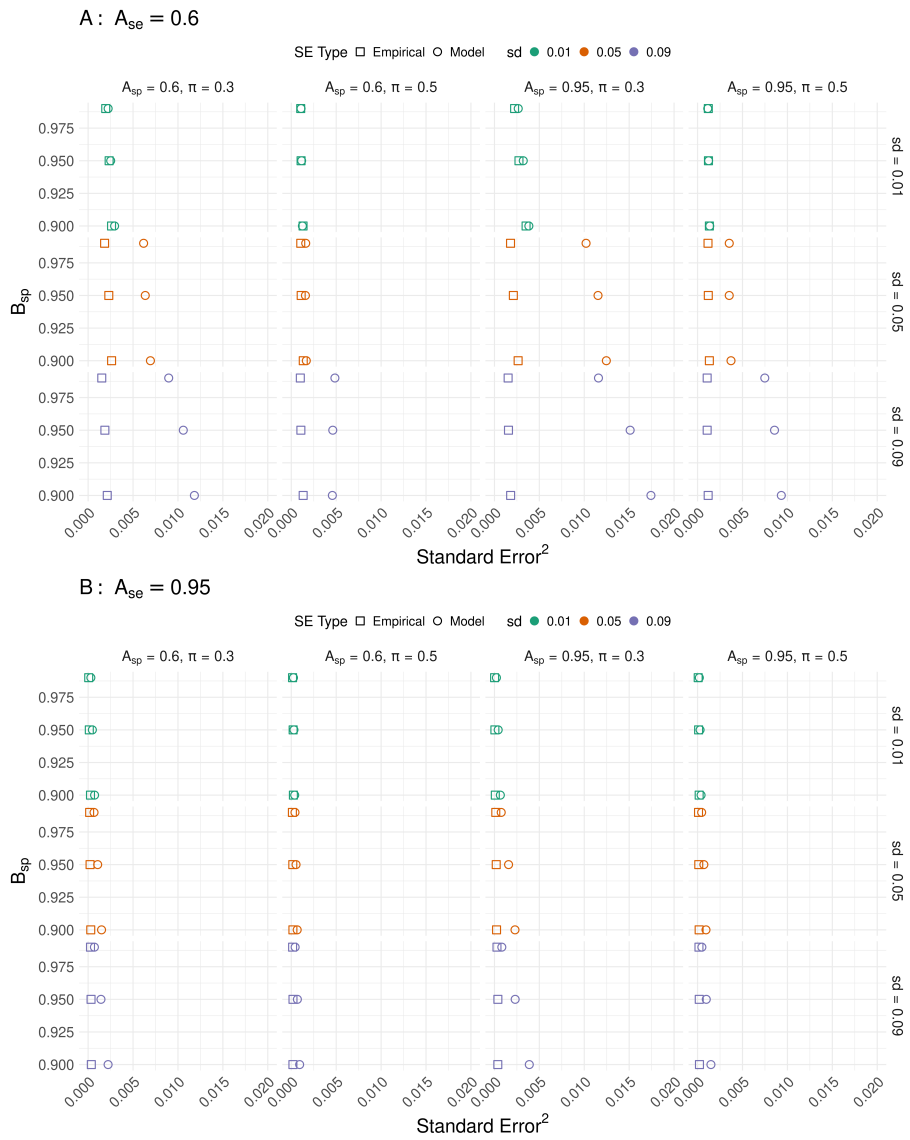

S4.3: EmpSE<sup>2</sup> and ModSE<sup>2</sup>, for low (A) and high (B) values of  $A_{se}$ , when  $n_{obs} = 500$ , for incorrectly centred priors.

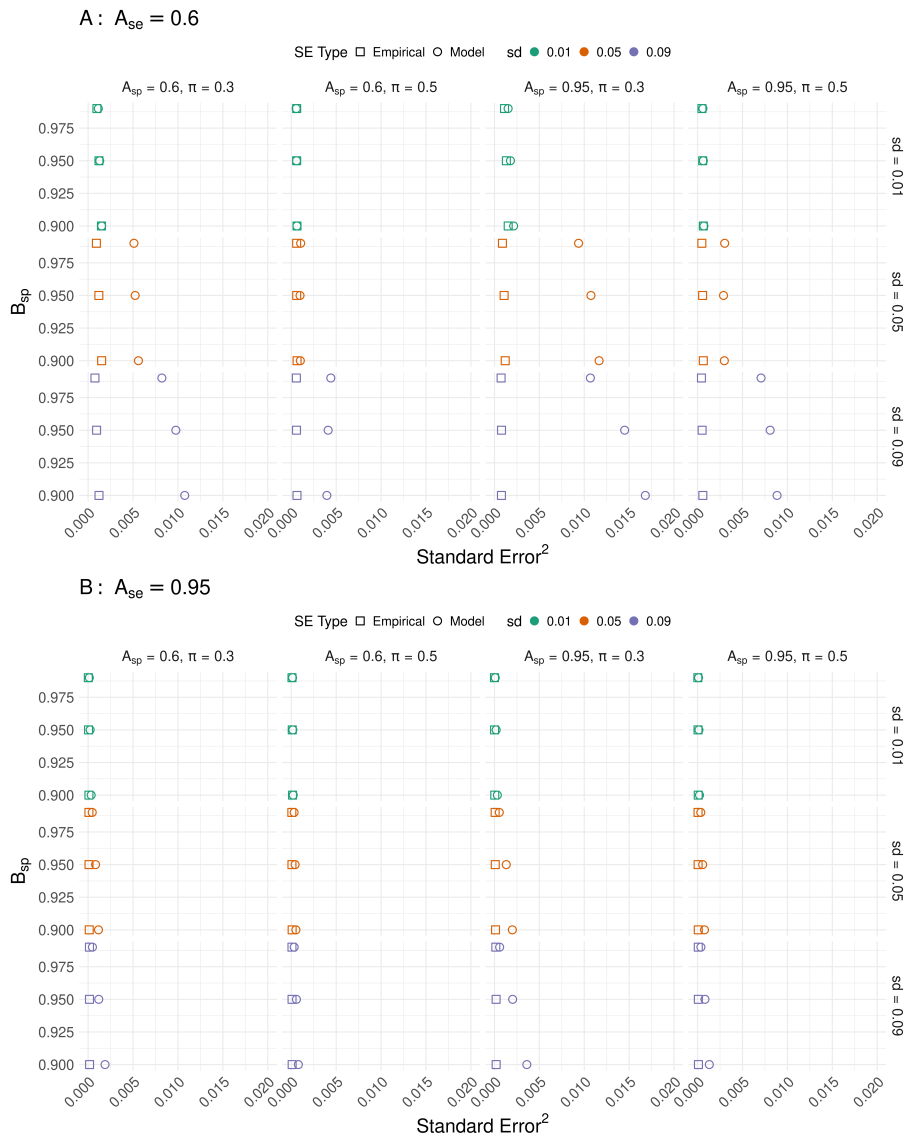

S4.4: EmpSE<sup>2</sup> and ModSE<sup>2</sup>, for low (A) and high (B) values of  $A_{se}$ , when  $n_{obs} = 1000$ , for incorrectly centred priors.

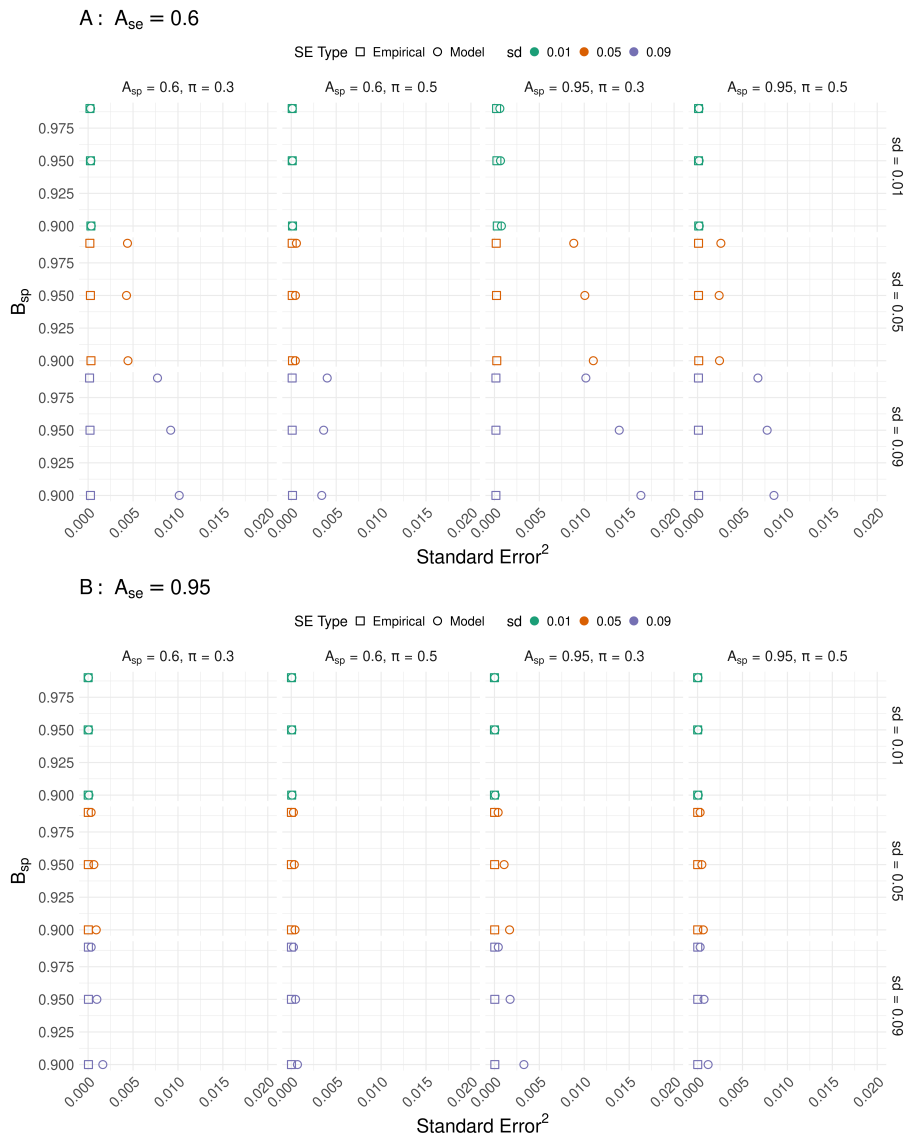

S4.5:  $\text{EmpSE}^2$  and  $\text{ModSE}^2$ , for low (A) and high (B) values of  $A_{se}$ , when  $n_{obs} = 5000$ , for incorrectly centred priors.
