# Supplementary material
Source: Research Square preprint supplement (doi:10.21203/rs.3.rs-9483308/v1)
Supplement: Supplementary file 3 [file cc6f9e0d7b590841fa4323f1.pdf]

## Supporting Information S1

### S1.1 Expectations of $\widehat{A}_{se}$ and $\widehat{A}_{sp}$

Suppose  $(TP, FN, FP, TN) \sim Multinomial(n, \mathbf{p})$  where  $\mathbf{p} = (p_1, p_2, p_3, p_4)$ . Then given that  $TP + FN = m$ , we know that the random variable  $TP$  follows a Binomial distribution:

$$TP|TP + FN = m \sim Binom(m, \frac{p_1}{p_1 + p_2}).$$

The conditional expectation of  $TP$  is then given by:

$$\mathbb{E}(TP|TP + FN = m) = m \frac{p_1}{p_1 + p_2}.$$

Therefore the conditional expectation of the ratio  $\frac{TP}{TP+FN}$  is given by:

$$\mathbb{E}\left(\frac{TP}{TP + FN} | TP + FN = m\right) = \frac{1}{m} \mathbb{E}(TP | TP + FN = m) = \frac{1}{m} m \frac{p_1}{p_1 + p_2} = \frac{p_1}{p_1 + p_2}.$$

Since the conditional expectation of the proportion does not depend on the specific value of  $m$  (as long as  $m > 0$ ), by the Law of Total Expectation, we have that the expected value of  $\widehat{A}_{se} = \frac{TP}{TP+FN}$  is  $\frac{p_1}{p_1+p_2}$ . Similarly, we can show that  $\mathbb{E}\left(\frac{TN}{TN+FP}\right) = \mathbb{E}(\widehat{A}_{sp}) = \frac{p_4}{p_4+p_3}$ .

### S1.2 Crude estimates of $A_{se}$ and $A_{sp}$ and corresponding bias under a ‘check the positives’ design

Let us denote the crude sensitivity of Test A by  $\widehat{A}_{se}^+ = \frac{TP}{TP+FN}$  and the crude specificity by  $\widehat{A}_{sp}^+ = \frac{TN}{TN+FP}$  under a ‘check the positives’ design. The underlying probabilities for observing a TP, FN, FP and TN outcome under this design are given by:

$$\begin{aligned} p_1^+ &= p_{111} = \pi(A_{se}B_{se} + c_1) \\ p_2^+ &= p_{011} = \pi((1 - A_{se})B_{se} - c_1) \\ p_3^+ &= p_{100} + p_{110} + p_{101} = (1 - \pi)(1 - A_{sp}) + \pi(A_{se}(1 - B_{se}) - c_1) \\ p_4^+ &= p_{000} + p_{010} + p_{001} = (1 - \pi)A_{sp} + \pi((1 - A_{se})(1 - B_{se}) + c_1), \end{aligned}$$

respectively. Then the expectations of  $\widehat{A}_{se}^+$  and  $\widehat{A}_{sp}^+$ , are given by:

$$\mathbb{E}(\widehat{A_{se}^+}) = \frac{p_1^+}{p_1^+ + p_2^+} = \frac{\pi(A_{se}B_{se} + c_1)}{\pi(A_{se}B_{se} + c_1) + \pi((1 - A_{se})B_{se} - c_1)} = A_{se} + \frac{c_1}{B_{se}},$$

$$\begin{aligned} \mathbb{E}(\widehat{A_{sp}^+}) &= \frac{p_4^+}{p_4^+ + p_3^+} = \frac{(1 - \pi)(1 - A_{sp}) + \pi(A_{se}(1 - B_{se}) - c_1)}{(1 - \pi)(1 - A_{sp}) + \pi(A_{se}(1 - B_{se}) - c_1) + (1 - \pi)A_{sp} + \pi((1 - A_{se})(1 - B_{se}) + c_1)} \\ &= \frac{(1 - \pi)A_{sp} + \pi((1 - A_{se})(1 - B_{se}) + c_1)}{1 - \pi B_{se}}. \end{aligned}$$

The conditional independence case then follows from setting  $c_1 = 0$ . The corresponding bias is then given by:

$$\text{Bias}(\widehat{A_{se}^+}) = \mathbb{E}(\widehat{A_{se}^+}) - A_{se} = \frac{c_1}{B_{se}} \leq \frac{\min(A_{se}, B_{se}) - A_{se}B_{se}}{B_{se}},$$

$$\begin{aligned} \text{Bias}(\widehat{A_{sp}^+}) &= \mathbb{E}(\widehat{A_{sp}^+}) - A_{sp} = \frac{(1 - \pi)A_{sp} + \pi((1 - A_{se})(1 - B_{se}) + c_1)}{1 - \pi B_{se}} - A_{sp} \\ &= \frac{\pi((1 - B_{se})(1 - A_{se} - A_{sp}) + c_1)}{1 - \pi B_{se}}. \end{aligned}$$
