# Supplementary material
Source: Research Square preprint supplement (doi:10.21203/rs.3.rs-9483308/v1)
Supplement: Supplementary file 5 [file efaab20135b780e0ec6cce99.pdf]

## Supporting Information S2

R code for simulating data according to ‘check the negatives’ design and fitting adjustment model for one of six subsets ( $sd = 0.01$  and  $A_{se} = 0.95$ ), using a correctly centred prior for  $B_{sp}$ .

```
library(foreach)
library(rjags)
require(parallel)
require(doParallel)

# Define parameter values
n_vals <- c(500, 1000, 5000)
pi_vals <- c(0.3, 0.5)
A_se_vals <- c(0.95)
A_sp_vals <- c(0.6, 0.95)
B_sp_vals <- c(0.9, 0.95, 0.99)

# Number of simulations for each parameter combination
n_sim <- 400

# Grid of all parameter combinations
param_grid <- expand.grid(
  n = n_vals,
  pi = pi_vals,
  A_se = A_se_vals,
  A_sp = A_sp_vals,
  B_sp = B_sp_vals
)

# Function to generate data from multinomial distribution
data_gen <- function(pi, A_se, A_sp, B_sp, n_samples, seed) {
  set.seed(seed) # Set seed for reproducibility within each worker

  p1 <- pi * A_se + (1 - pi) * ((1 - B_sp) * (1 - A_sp))
  # TP
  p2 <- pi * (1 - A_se) + (1 - pi) * ((1 - B_sp) * A_sp)
  # FN
  p3 <- (1 - pi) * (B_sp * (1 - A_sp))
  # FP
  p4 <- (1 - pi) * (B_sp * A_sp)
  # TN
```

```

p <- c(p1, p2, p3, p4)

if (abs(sum(p) - 1) > 1e-6) {
  stop("Probabilities do not sum to 1. Check your inputs.")
}

d <- rmultinom(1, n.samples, p) # Generate data
return(d)
}

# Set number of chains, before and after burn in iterations
n.chains <- 3
burnin.it <- 30000
sample.it <- 1500000

# Define the JAGS model as function
JAGS_model <- function(row, sd) {
  mean <- (row$B_sp)
  v <- sd^2
  b <- (mean * (1 - mean)^2) / v + mean - 1
  a <- (mean * b) / (1 - mean)

  datalist <- list(M = c(row$TP, row$FN, row$FP, row$TN),
# TP, FN, FP, TN
                 a = a,
                 b = b,
                 N = row$n)

  model_string <- "model{
- M[1:4] ~ dmulti(p[1:4], N) # multinomial likelihood for the 2x2 data
- # Model for p[1:4], assuming conditional independence
- p[1] <- pi * A_se + (1 - pi) * ((1 - B_sp) * (1 - A_sp)) #TP
- p[2] <- pi * (1 - A_se) + (1 - pi) * ((1 - B_sp) * A_sp) #FN
- p[3] <- (1 - pi) * (B_sp * (1 - A_sp)) #FP
- p[4] <- (1 - pi) * (B_sp * A_sp) #TN
- # Informative prior for specificity
- B_sp ~ dbeta(a, b)T(0, 0.9999)
- # Vague priors for the other parameters

```

```

--pi~dbeta(1,1)## prevalence
--A_se~dbeta(1,-1)## sensitivity of the index test
--A_sp~dbeta(1,-1)## specificity of the index test

}"

model <- jags.model(file = textConnection(model_string),
                    data = datalist, n.chains = n.chains)
update(model, n.iter = burnin.it)

posterior_sample <- coda.samples(model,
                                variable.names = c("A_se", "A_sp",
                                                    "B_sp", "pi"),
                                n.iter = sample.it)

summary_stats <- summary(posterior_sample)

gel_diag <- gelman.diag(posterior_sample)$psrf[1:4]
neff <- effectiveSize(posterior_sample)

# Relevant statistics
return(list(
  adjusted_se = summary_stats$quantiles["A_se", "50%"],
  A_se_SD = summary_stats$statistics["A_se", "SD"],
  lower_se = summary_stats$quantiles["A_se", "2.5%"],
  higher_se = summary_stats$quantiles["A_se", "97.5%"],
  gr = all(gel_diag <= 1.1),
  neff = all(neff >= 2500)
))
}

# Set up parallel
cl <- makeCluster(24) # Use 24 cores
registerDoParallel(cl)

# Set seed for reproducibility
base_seed <- 12345

# Parallel execution
results <- foreach(i = 1:nrow(param_grid), .packages = c("rjags"),
                  .combine = rbind) %dopar% {
  row <- param_grid[i, ]
  sim_results <- data.frame()

```

```

for (sim in 1:n_sim) {
  # Generate data
  counts <- data_gen(row$pi, row$A_se, row$A_sp, row$B_sp, row$n,
    base_seed + i * 1000 + sim)
  data <- data.frame(
    n = row$n,
    pi = row$pi,
    A_se = row$A_se,
    A_sp = row$A_sp,
    B_sp = row$B_sp,
    TP = counts[1, 1],
    FN = counts[2, 1],
    FP = counts[3, 1],
    TN = counts[4, 1]
  )

  # Run JAGS model
  res <- JAGS_model(data, sd = 0.01)

  # Combine results for this simulation
  sim_result <- data.frame(
    n = row$n,
    pi = row$pi,
    A_se = row$A_se,
    A_sp = row$A_sp,
    B_sp = row$B_sp,
    TP = data$TP,
    FN = data$FN,
    FP = data$FP,
    TN = data$TN,
    adjusted_se = res$adjusted_se,
    A_se_SD = res$A_se_SD,
    lower_se = res$lower_se,
    higher_se = res$higher_se,
    gr = res$gr,
    neff = res$neff,
    sd = 0.01)

  sim_results <- rbind(sim_results, sim_result) # Append results
}

return(sim_results)
}

# Stop cluster
stopCluster(cl)

```

```
# Save results  
save(results , file = "001_high.RData")
```
